# Supplementary material
Source: PubMed Central journal article supplement (PMC2151316)
Supplement: hesr0042-2354-ap1.pdf [file hesr0042-2354-ap1.pdf]

## Appendix Demographic and Span Data for Disenrollment and Re-enrollment Hazard Models

### Dis-enrollment Models: Descriptive Statistics

| Arizona                            |                            | Kentucky                           |                            |
|------------------------------------|----------------------------|------------------------------------|----------------------------|
| <b>Spans</b>                       |                            | <b>Spans</b>                       |                            |
| N                                  | 50,227                     | N                                  | 38,858                     |
| Average Length                     | 10.31 months               | Average Length                     | 9.65 months                |
| <b>Demographic Characteristics</b> | <b>All Enrolled Spells</b> | <b>Demographic Characteristics</b> | <b>All Enrolled Spells</b> |
| <u>Age</u>                         |                            | <u>Age</u>                         |                            |
| 0 to 5                             | 32%                        | 0 to 5                             | 36%                        |
| 6 to 12                            | 46%                        | 6 to 12                            | 37%                        |
| 13 to 18                           | 23%                        | 13 to 18                           | 26%                        |
| <u>Gender</u>                      |                            | <u>Gender</u>                      |                            |
| Male                               | 51%                        | Male                               | 52%                        |
| Female                             | 49%                        | Female                             | 48%                        |
| <u>Race/ethnicity</u>              |                            | <u>Race/ethnicity</u>              |                            |
| White                              | 31%                        | White                              | 88%                        |
| Black                              | 4%                         | Non-White                          | 12%                        |
| Hispanic                           | 59%                        |                                    |                            |
| Asian or Other                     | 2%                         |                                    |                            |
| Unknown                            | 5%                         |                                    |                            |
| <u>Average Family Size</u>         | 4.16                       | <u>Average Number of Siblings</u>  | 1.15                       |

### Re-enrollment Models: Descriptive Statistics

| Arizona                            |                            | Kentucky                           |                            |
|------------------------------------|----------------------------|------------------------------------|----------------------------|
| <b>Spans</b>                       |                            | <b>Spans</b>                       |                            |
| N                                  | 47,430                     | N                                  | 24,104                     |
| Average Length                     | 19.4 months                | Average Length                     | 14.9 months                |
| <b>Demographic Characteristics</b> | <b>All Enrolled Spells</b> | <b>Demographic Characteristics</b> | <b>All Enrolled Spells</b> |
| <u>Age</u>                         |                            | <u>Age</u>                         |                            |
| 0 to 5                             | 30%                        | 0 to 5                             | 37%                        |
| 6 to 12                            | 44%                        | 6 to 12                            | 36%                        |
| 13 to 18                           | 26%                        | 13 to 18                           | 27%                        |
| <u>Gender</u>                      |                            | <u>Gender</u>                      |                            |
| Male                               | 51%                        | Male                               | 52%                        |
| Female                             | 49%                        | Female                             | 48%                        |
| <u>Race/ethnicity</u>              |                            | <u>Race/ethnicity</u>              |                            |
| White                              | 31%                        | White                              | 87%                        |
| Black                              | 4%                         | Non-White                          | 13%                        |
| Hispanic                           | 58%                        |                                    |                            |
| Asian or Other                     | 2%                         |                                    |                            |
| Unknown                            | 5%                         |                                    |                            |
| <u>Average Family Size</u>         | 4.17                       | <u>Average Number of Siblings</u>  | 1.18                       |

\* Cohorts analyzed entered premium-paying SCHIP prior to July 2004 in Arizona and prior to December 2003 in Kentucky.

Source: Monthly administrative enrollment data from Arizona and Kentucky 2001-02 to 2004-05.

### Dis-enrollment Hazard Model: Findings on Demographic Variables

| Variable                                         | Arizona <sup>1</sup> |         | Kentucky <sup>1</sup> |         |
|--------------------------------------------------|----------------------|---------|-----------------------|---------|
|                                                  | Hazard Ratio         | p-value | Hazard Ratio          | p-value |
| <b>Demographics (Ref: Male, White, 13 to 18)</b> |                      |         |                       |         |
| Female                                           | 1.02                 | 0.093   | 0.99                  | 0.427   |
| Non-white                                        | N/A                  | N/A     | 1.12                  | 0.000   |
| Black                                            | 1.14                 | 0.000   | N/A                   | N/A     |
| Hispanic                                         | 0.90                 | 0.000   | N/A                   | N/A     |
| Asian or Other Race                              | 0.90                 | 0.001   | N/A                   | N/A     |
| Unknown Race                                     | 0.81                 | 0.000   | N/A                   | N/A     |
| 0 to 5                                           | 1.23                 | 0.000   | N/A                   | N/A     |
| 1 to 5                                           | N/A                  | N/A     | 1.11                  | 0.000   |
| 6 to 12                                          | 0.99                 | 0.542   | 0.97                  | 0.015   |
| Household Size                                   | 1.05                 | 0.000   | N/A                   | N/A     |
| Number of Siblings                               | N/A                  | N/A     | 1.07                  | 0       |
| <b>Sample Size</b>                               | <b>50,227</b>        |         | <b>38,858</b>         |         |

<sup>1</sup> Data on policy variables including Premium Change and Recertification can be found in Table 1a.

### Re-enrollment Hazard Model: Findings on Demographic Variables

| Variable                                         | Arizona <sup>1</sup> |         | Kentucky <sup>1</sup> |         |
|--------------------------------------------------|----------------------|---------|-----------------------|---------|
|                                                  | Hazard Ratio         | p-value | Hazard Ratio          | p-value |
| <b>Demographics (Ref: Male, White, 13 to 18)</b> |                      |         |                       |         |
| Female                                           | 1.00                 | 0.975   | 0.99                  | 0.702   |
| Non-white                                        | N/A                  | N/A     | 0.99                  | 0.919   |
| Black                                            | 1.05                 | 0.521   | N/A                   | N/A     |
| Hispanic                                         | 1.32                 | 0.000   | N/A                   | N/A     |
| Asian or Other Race                              | 0.97                 | 0.669   | N/A                   | N/A     |
| Unknown Race                                     | 1.03                 | 0.628   | N/A                   | N/A     |
| 0 to 5                                           | 1.15                 | 0.000   | N/A                   | N/A     |
| 1 to 5                                           | N/A                  | N/A     | 1.17                  | 0.000   |
| 6 to 12                                          | 1.29                 | 0.000   | 1.10                  | 0.017   |
| Household Size                                   | 1.01                 | 0.157   | N/A                   | N/A     |
| Number of Siblings                               | N/A                  | N/A     | 1.02                  | 0.298   |
| <b>Sample Size</b>                               | <b>47,430</b>        |         | <b>24,104</b>         |         |

<sup>1</sup> Data on policy variables including Premium Change and Original Exits from premium-paying SCHIP are in Table 1c.
